# Supplementary material for: Ocrelizumab exposure in relapsing–remitting multiple sclerosis: 10-year analysis of the phase 2 randomized clinical trial and its extension
Source: PubMed Central journal article supplement (PMC10827899; doi:10.1007/s00415-023-11943-4), 2023-10-31
Supplement: 415_2023_11943_MOESM12_ESM.pdf [file 415_2023_11943_MOESM12_ESM.pdf]

**Ocrelizumab exposure in relapsing–remitting multiple sclerosis: 10-year analysis of the phase 2 randomized clinical trial and its extension**

Journal of Neurology

**Authors: Ludwig Kappos, Anthony Traboulsee, David K.B. Li, Amit Bar-Or, Frederik Barkhof, Xavier Montalban, David Leppert, Anna Baldinotti, Hans-Martin Schneble, Harold Koendgen, Annette Sauter, Qing Wang, Stephen L. Hauser**

**Corresponding author:**

**Prof. Ludwig Kappos, MD**

**Research Center for Clinical Neuroimmunology and Neuroscience Basel (RC2NB)**

**Departments of Head, Spine and Neuromedicine, Clinical Research, Biomedicine and Clinical Research, University Hospital Basel**

**University of Basel, Basel**

**Switzerland**

**Email: ludwig.kappos@usb.ch**

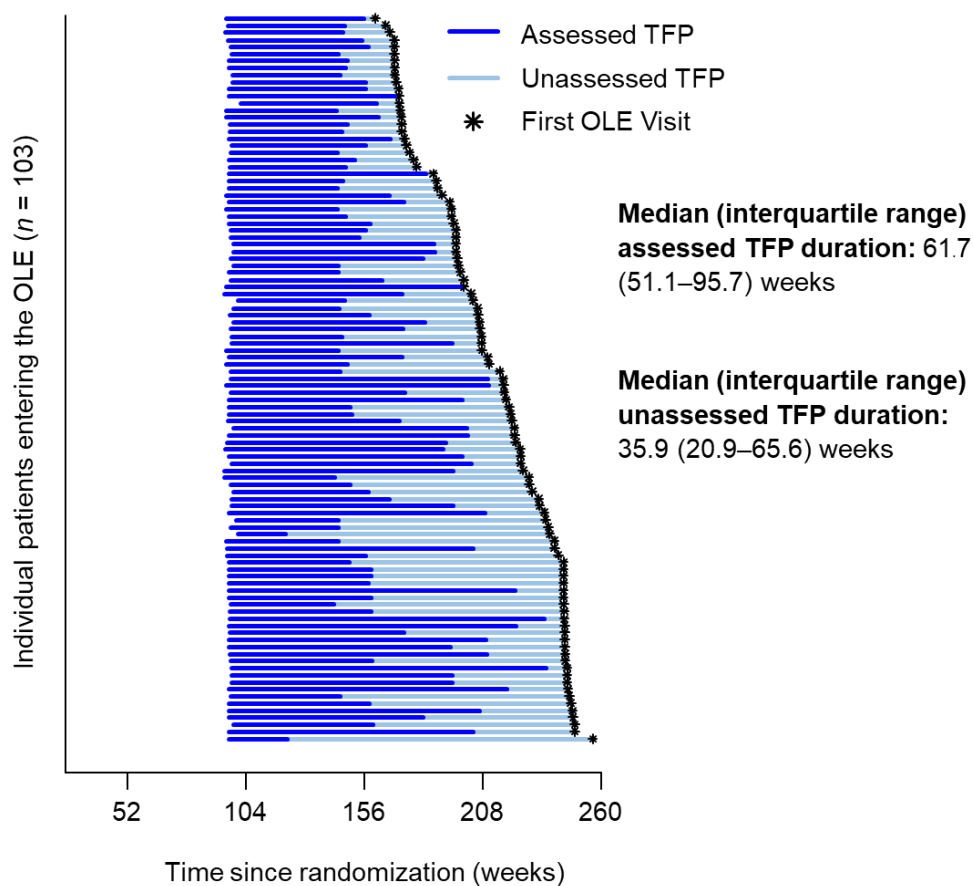

**Supplementary Fig. 2** Duration of the study treatment-free period for each patient who entered the OLE to receive ocrelizumab 600 mg every 24 weeks ( $n = 103$ )

*Assessed TFP* assessed treatment-free period, *IQR* interquartile range, *OLE* open-label extension, *unassessed TFP* unassessed treatment-free period
